# Supplementary material
Source: ML conference proceedings conference paper supplement (https://openreview.net/forum?id=jHMNoZQm5z)
Supplement: supplementary_material [file attachment]

---

# Supplementary Material: Redistribution of Weights and Activations for AdderNet Quantization

---

Anonymous Author(s)

Affiliation

Address

email

## 1 A Appendix

### 2 A.1 Proof of Proposition 2

3 *Proof.* For a weight  $W \in \mathbb{R}^{d \times d \times c_{in} \times c_{out}}$  and an input activation  $X \in \mathbb{R}^{h \times w \times c_{in}}$ , the FLOPs of  
4  $\bar{X} \oplus \bar{W}$  is  $2hw(c_{in}d^2 + 1)c_{out}$ . In addition, the FLOPs required to calculate  $\bar{w}$  and  $\bar{x}$  are  $c_{in}d^2c_{out}$   
5 and  $ghwc_{in}$ , respectively. Besides, the size of the output activation can be calculated by:

$$h_{out} = \lfloor (h - d + 2 * padding) / stride + 1 \rfloor, w_{out} = \lfloor (w - d + 2 * padding) / stride + 1 \rfloor. \quad (1)$$

6 Without loss of generality, assume that the values of *padding* and *stride* are both 1, therefore, the  
7 FLOPs required to dequantize the output activation is  $h_{out}w_{out}c_{out} = (h - d + 3)(w - d + 3)c_{out}$ .  
8 Finally, all FLOPs required for a layer quantization is:

$$FLOPs_{all} = 2hw(c_{in}d^2 + 1)c_{out} + c_{in}d^2c_{out} + ghwc_{in} + (h - d + 3)(w - d + 3)c_{out}. \quad (2)$$

9 Without loss of generality, assume that  $d = 3$ ,  $c_{in} = c_{out} = c$ , and  $h = w = k$ , then

$$FLOPs_{all} = 18k^2c^2 + gk^2c + 9c^2 + 3k^2c. \quad (3)$$

10 Compared with only one scale ( $g = 1$ ), FLOPs are increased by  $r$  when adopting multiple scales  
11 ( $g \geq 2$ ):

$$r = \frac{(g - 1)k^2c}{18k^2c^2 + k^2c + 9c^2 + 3k^2c} = \frac{(g - 1)k^2}{(18k^2 + 9)c + 4k^2} \approx \frac{g - 1}{18c + 4}, \quad (4)$$

12 As we discussed in the section of experiments, the value of  $g$  that we adopt is 4. In this case, Eq. 4  
13 can be further simplified to

$$r \approx \frac{g - 1}{18c + 4} = \frac{3}{18c + 4} \approx \frac{1}{6c + 1}. \quad (5)$$

14 Considering that the magnitude of  $c$  is generally in the tens or hundreds of common neural networks,  
15 thus the value of  $r$  is very small. Therefore, the increase in FLOPs brought by the scheme of  
16 group-shared scales is negligible.  $\square$

### 17 A.2 Full-precision Results

18 In the section of experiments, we re-trained multiple full-precision adder networks on various datasets.  
19 The full-precision results on CIFAR-10 and CIFAR-100 are reported in Table 1, and the full-precision  
20 results on ImageNet are reported in Table 2, both denoted by AddNN. The results of AddNN are  
21 basically consistent with the results in [1]. The baseline results of convolutional neural network  
22 (CNN) and binary neural network (BNN) are cited from [1].

Table 1: Full-precision results on CIFAR-10 and CIFAR-100 datasets.

| Model     | Method | # Mul. | # Add.  | # XNOR. | CIFAR-10 (%) | CIFAR-100 (%) |
|-----------|--------|--------|---------|---------|--------------|---------------|
| VGG-Small | CNN    | 0.65G  | 0.65G   | 0       | 93.80        | 72.73         |
|           | BNN    | 0.05G  | 0.65G   | 0.60G   | 89.80        | 67.24         |
|           | AddNN  | 0.05G  | 1.25G   | 0       | 93.44        | 73.60         |
| ResNet-20 | CNN    | 41.17M | 41.17M  | 0       | 92.25        | 68.14         |
|           | BNN    | 0.45M  | 41.17M  | 40.72M  | 84.87        | 54.14         |
|           | AddNN  | 0.45M  | 81.89M  | 0       | 91.42        | 67.59         |
| ResNet-32 | CNN    | 69.12M | 69.12M  | 0       | 93.29        | 69.74         |
|           | BNN    | 0.45M  | 69.12M  | 68.67M  | 86.74        | 56.21         |
|           | AddNN  | 0.45M  | 137.79M | 0       | 92.72        | 70.17         |

Table 2: Full-precision results on ImageNet.

| Model     | Method | # Mul. | # Add. | # XNOR. | Top-1 Acc (%) | Top-5 Acc (%) |
|-----------|--------|--------|--------|---------|---------------|---------------|
| ResNet-18 | CNN    | 1.8G   | 1.8G   | 0       | 69.8          | 89.1          |
|           | BNN    | 0.1G   | 1.8G   | 1.7G    | 51.2          | 73.2          |
|           | AddNN  | 0.1G   | 3.5G   | 0       | 67.9          | 87.8          |
| ResNet-50 | CNN    | 3.9G   | 3.9G   | 0       | 76.2          | 92.9          |
|           | BNN    | 0.1G   | 3.9G   | 3.8G    | 55.8          | 78.4          |
|           | AddNN  | 0.1G   | 7.6G   | 0       | 75.0          | 91.9          |

23 **A.3 Distribution of the Weights and Activations**

24 In Figure 1, we visualize the histogram of the weights and activations in AdderNet. The input full-  
 25 precision (FP) activations and weights in pre-trained AdderNet show a significant difference, which  
 26 pose a huge challenge for AdderNet quantization. Other AdderNet quantization methods [3, 2] fail to  
 27 deal with this challenge, leading to the phenomenon of over clamp and bits waste, further resulting  
 28 in a poor quantized accuracy. In contrast, our quantization method can effectively address this  
 29 challenge by the redistribution of full-precision weights and activations, resulting a good quantized  
 30 accuracy. One-shared scale is adopted here for the simplification of visualization, and symmetric  
 31 4-bit quantization is taken as an example.

32 **A.4 Analysis on the Ratio of Discarded Outliers**

33 As we discussed in the subsection of outliers clamp for activations, the value  $r_x = \widetilde{\mathbb{X}}[\lfloor \alpha * (n - 1) \rfloor]$  is  
 34 selected as the range of activations for the calculation of scale, where  $\alpha \in (0, 1]$  is a hyper-parameter  
 35 controlling the ratio of discarded outliers in activations. We supplement the ablation study of this  
 ratio with 4-bit quantized adder ResNet-20 network on CIFAR-100 dataset.

Table 3: Analysis on the ratio of discarded outliers in activations.

|          |        |        |        |       |
|----------|--------|--------|--------|-------|
| $\alpha$ | 0.9985 | 0.9990 | 0.9995 | 1.0   |
| Acc (%)  | 67.29  | 67.35  | 67.11  | 65.17 |

36  
 37 As shown in Table 3,  $\alpha = 1$  means that the scheme of outliers clamp for activations is not adopted,  
 38 resulting in a significantly degraded quantized accuracy. The quantized accuracy can be improved  
 39 with an appropriate  $\alpha$ .

40 **A.5 Limitations and Societal Impacts**

41 Our AdderNet quantization method has one major limitation: as the number of bits decreases, the  
 42 accuracy loss of the quantization model will increase. Therefore, quantization-aware training is  
 43 necessary for the low bits, which is time consuming and computationally consuming.

44 As for the societal impacts, the proposed quantization method can further reduce the energy con-  
 45 sumption of AdderNet with a lower quantized accuracy loss. The low power devices equipped with  
 46 quantized AdderNet can be deployed to surveillance scenario. If used improperly, there may be a risk  
 47 of information leakage.

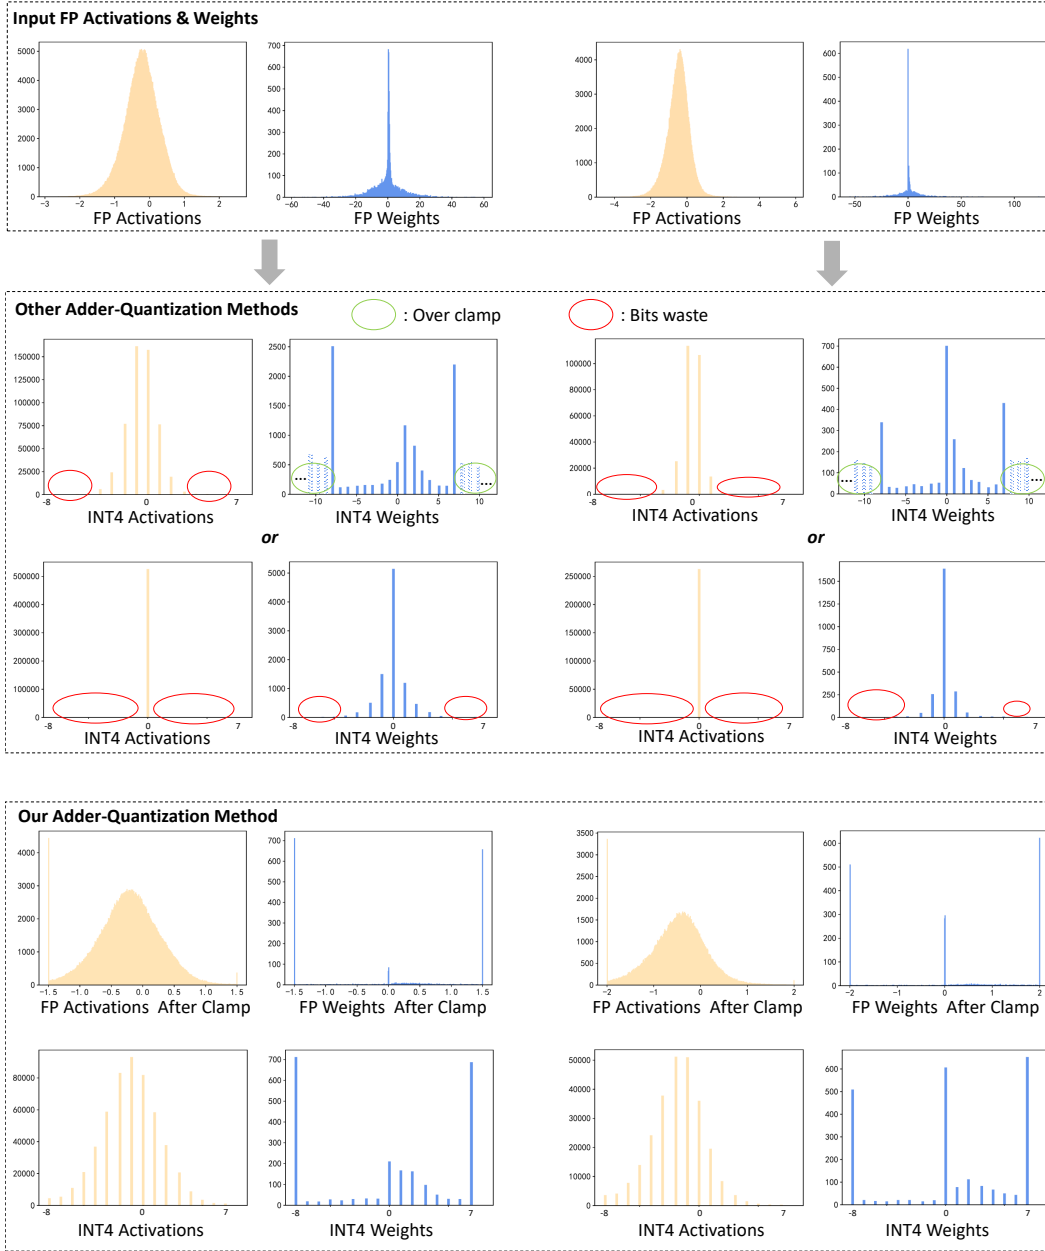

Figure 1: Distribution of the weights and activations in AdderNet.

48 **References**

49 [1] Hanqing Chen, Yunhe Wang, Chunjing Xu, Boxin Shi, Chao Xu, Qi Tian, and Chang Xu. Addernet: Do we  
50 really need multiplications in deep learning? In *Proceedings of the IEEE/CVF Conference on Computer  
51 Vision and Pattern Recognition*, pages 1468–1477, 2020.

52 [2] Xinghao Chen, Chang Xu, Mingjing Dong, Chunjing Xu, and Yunhe Wang. An empirical study of adder  
53 neural networks for object detection. *Advances in Neural Information Processing Systems*, 34, 2021.

54 [3] Yunhe Wang, Mingqiang Huang, Kai Han, Hanqing Chen, Wei Zhang, Chunjing Xu, and Dacheng Tao.  
55 Addernet and its minimalist hardware design for energy-efficient artificial intelligence. *arXiv preprint  
56 arXiv:2101.10015*, 2021.
